# Supplementary material for: First-principles study of bilayer hexagonal structure of SN2 nanosheet: a highly stable non-metal platform for the quantum anomalous Hall effect
Source: Royal Society of Chemistry journal article supplement (doi:10.1039/d1tc00547b), 2021-01-01
Supplement: d1tc00547b1.pdf [file d1tc00547b1.pdf]

## Electronic Supplementary Information for

First-principles study of bilayer hexagonal structure of  $\text{SN}_2$  nanosheet: a highly stable non-metal platform for the quantum anomalous Hall effect

Yanli Wang<sup>a</sup> and Yi Ding<sup>b</sup>

a. Department of Physics, Zhejiang Sci-Tech University, Hangzhou, Zhejiang 310018, People's Republic of China.

b. Department of Physics, Hangzhou Normal University, Hangzhou, Zhejiang 311121, People's Republic of China.

### Contents:

Fig. S1: The possible 3D parent bulk structures of BHS- $\text{SN}_2$  system.

Fig. S2: The partial charge density and the fat-band analysis result of top valence bands.

Fig. S3: The phonon bands of  $\text{S}_3\text{N}_9$  and  $\text{AsS}_3\text{N}_8$  nanosheets.

Fig. S4: The mean-field theory results for the Curie temperature.

Fig. S5: The structures and Gibbs free energies of P-substituted  $\text{SN}_2$  supercells.

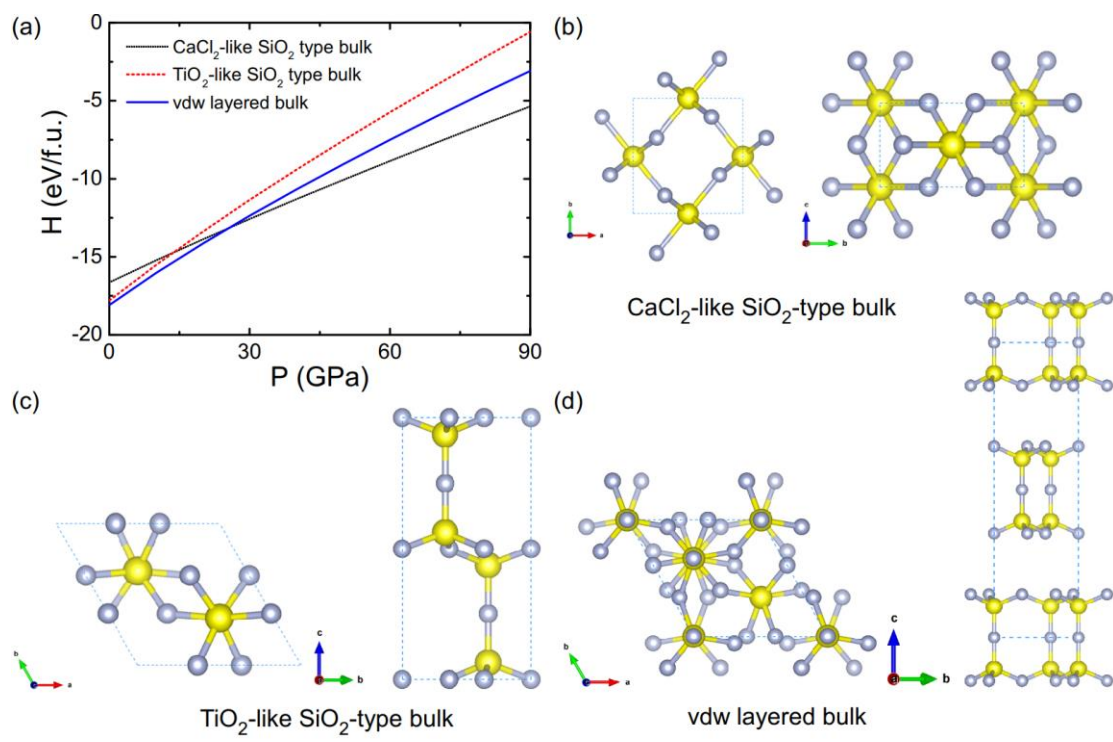

Figure S1: The enthalpies of different  $\text{SN}_2$  bulk structures as a function of pressures. The geometries of (b)  $\text{CaCl}_2$ -like  $\text{SiO}_2$ -type, (c)  $\text{TiO}_2$ -like  $\text{SiO}_2$ -type, and (d) vdw layered bulk structures for the  $\text{SN}_2$  system.

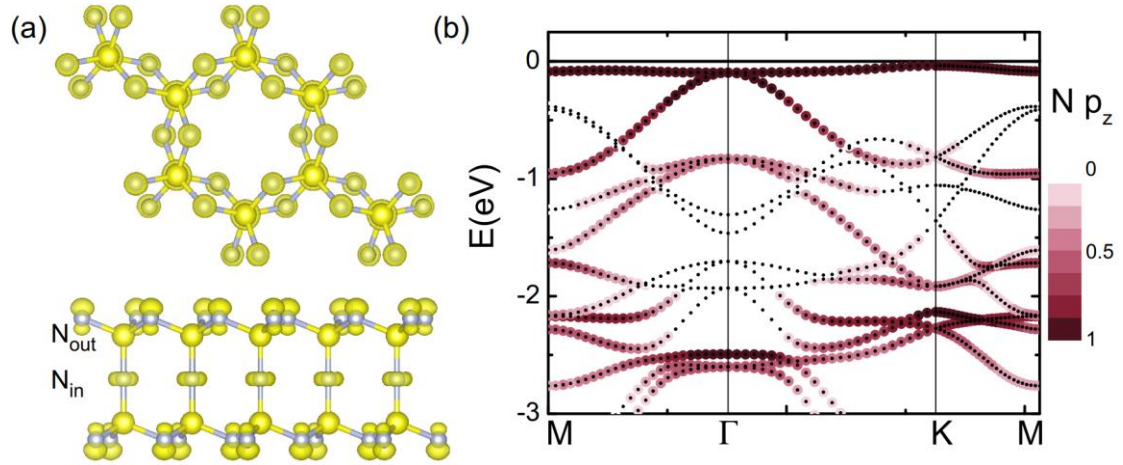

Figure S2: (a) The partial charge density of the flat band at  $\Gamma$  point. The isosurface is set to  $0.003 |e|/\text{\AA}^3$ . (b) The fat-band analysis of the PBE bands of BHS-SN<sub>2</sub> nanosheet. The contribution of N<sub>out</sub> p<sub>z</sub> orbitals is labelled by colors, and the maximum value is normalized to 1.

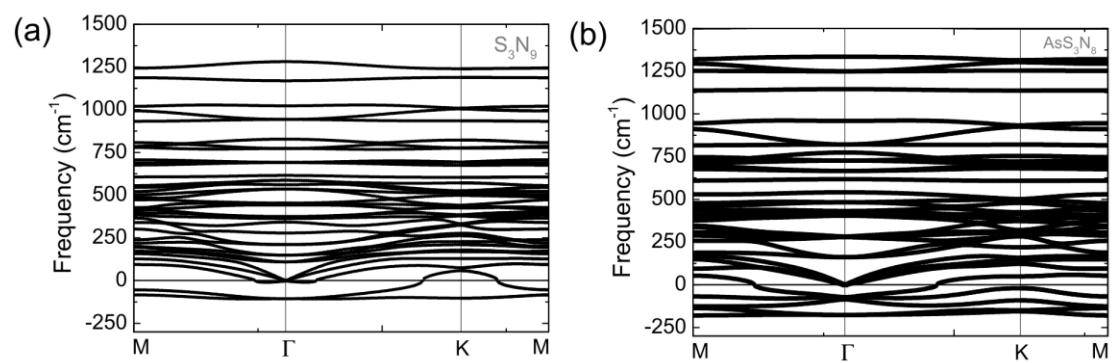

Figure S3: The phonon bands of (a)  $S_3N_9$  and (b)  $AsS_3N_8$  nanosheets.

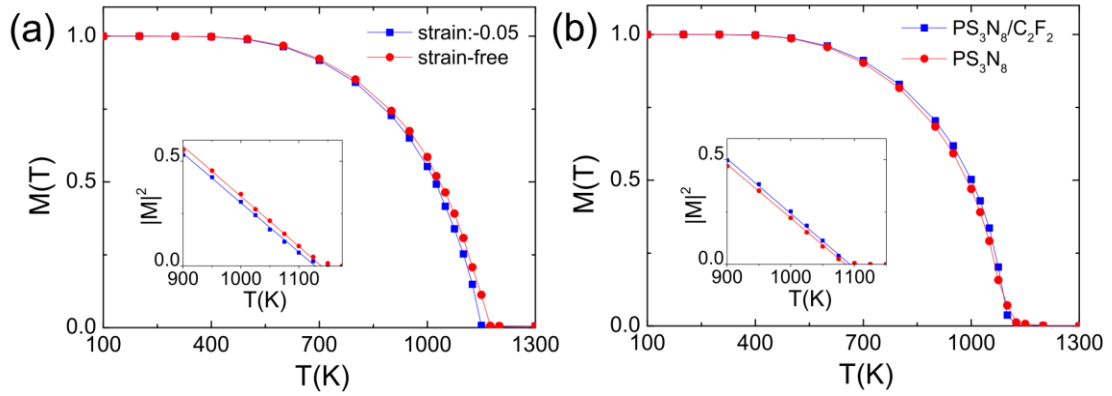

Figure S4: The mean-field theory results for the Curie temperature. (a) The temperature-dependent magnetic moment of hole-doped BHS-SN<sub>2</sub> nanosheet with a compressive strain of -0.05 and without strain. (b) The temperature-dependent magnetic moment of the isolated and fluorographene-supported PS<sub>3</sub>N<sub>8</sub> nanosheets. The insets depict the magnetic moment squared near the transition temperature, where a linear fitting is performed to evaluate the  $T_c$  values.

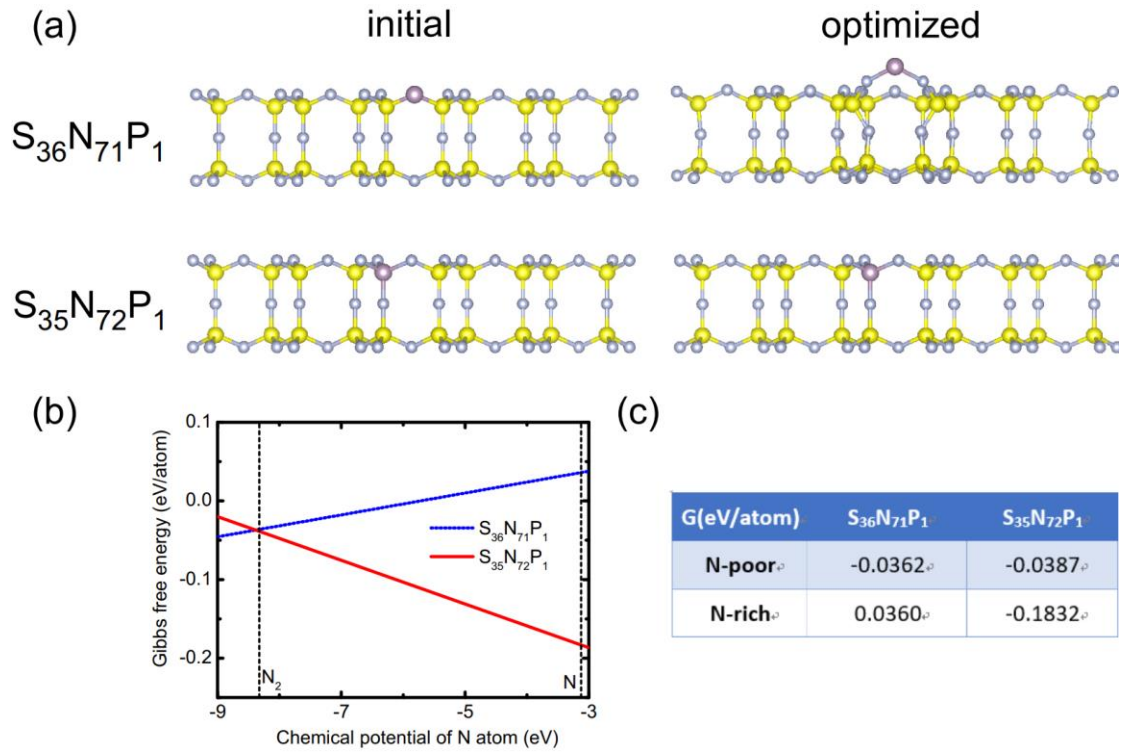

Figure S5: (a) The initial and optimized geometries of  $S_{36}N_{71}P_1$  and  $S_{35}N_{72}P_1$  nanosheets. (b) The variations of Gibbs free energies versus the chemical potential of N element for the  $S_{36}N_{71}P_1$  and  $S_{35}N_{72}P_1$  nanosheets. (d) The Gibbs free energy values of  $S_{36}N_{71}P_1$  and  $S_{35}N_{72}P_1$  nanosheets under the N-poor and N-rich conditions. Here, the N-poor and N-rich conditions correspond to  $\mu_N = E_{N_2}/2$  and  $\mu_N = E_{Natom}$ , respectively.
